# Supplementary material
Source: MDPI journal article supplement (https://www.mdpi.com/2076-3417/12/11/5722)
Supplement: s1 [file s1]

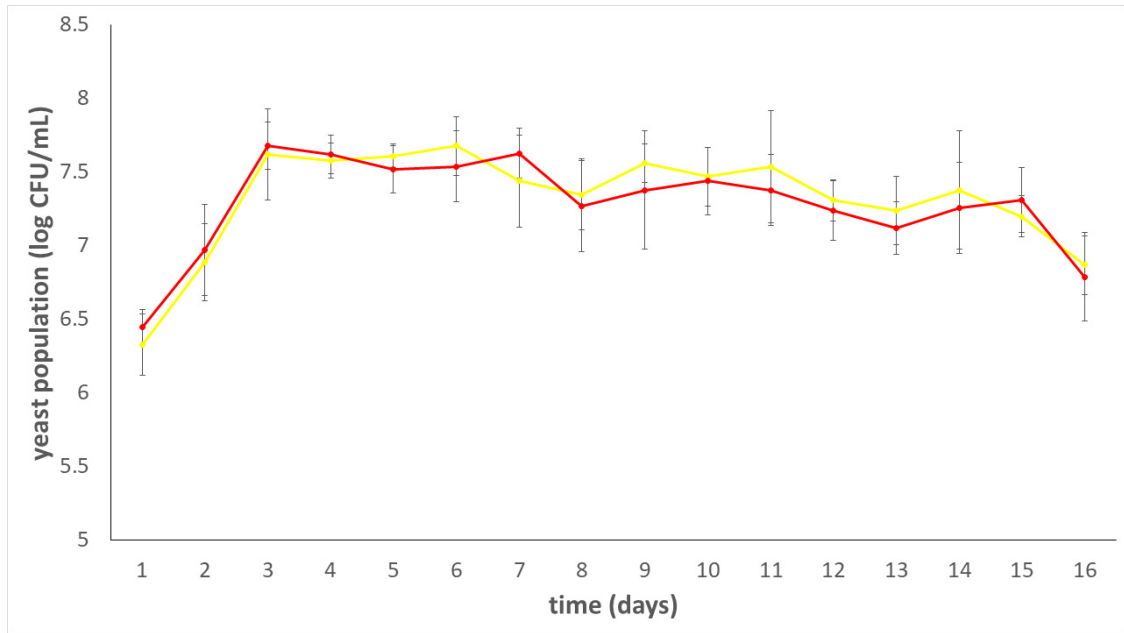

**Figure S1.** Yeast population (in log CFU/mL) during alcoholic fermentation of Moschofilero must for white (yellow) and rosé (red) winemaking.

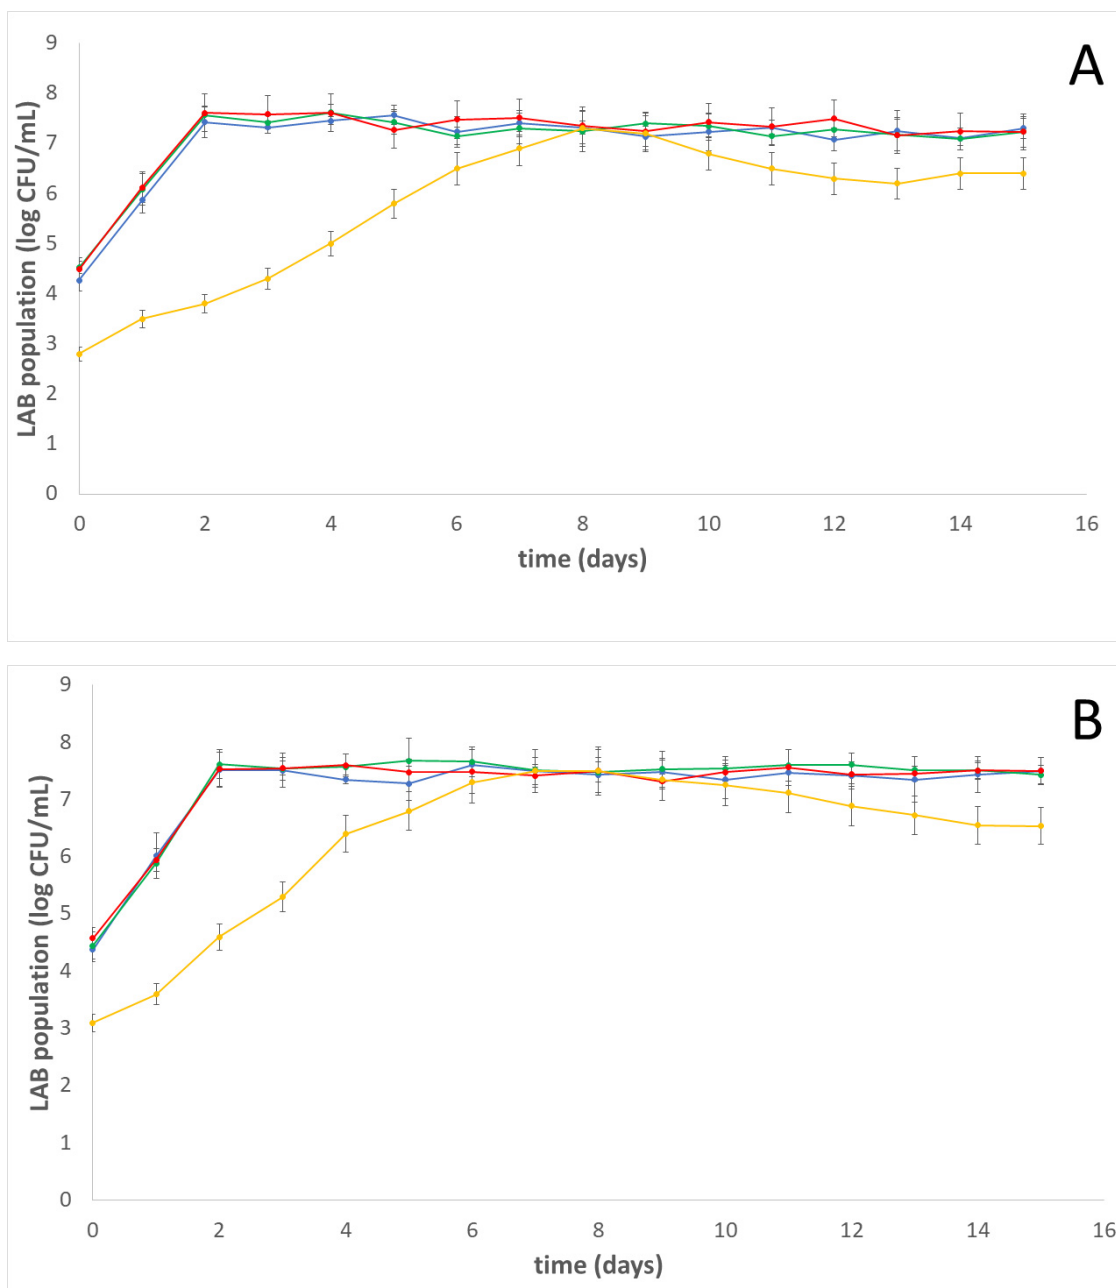

**Figure S2.** LAB population (in log CFU/mL) during spontaneous MLF (yellow), or after inoculation with *Oenococcus oeni* strains Viniflora® CH16 (blue), Viniflora® Oenos (green) and Viniflora® CiNe (red) during white (A) and rosé (B) winemaking.

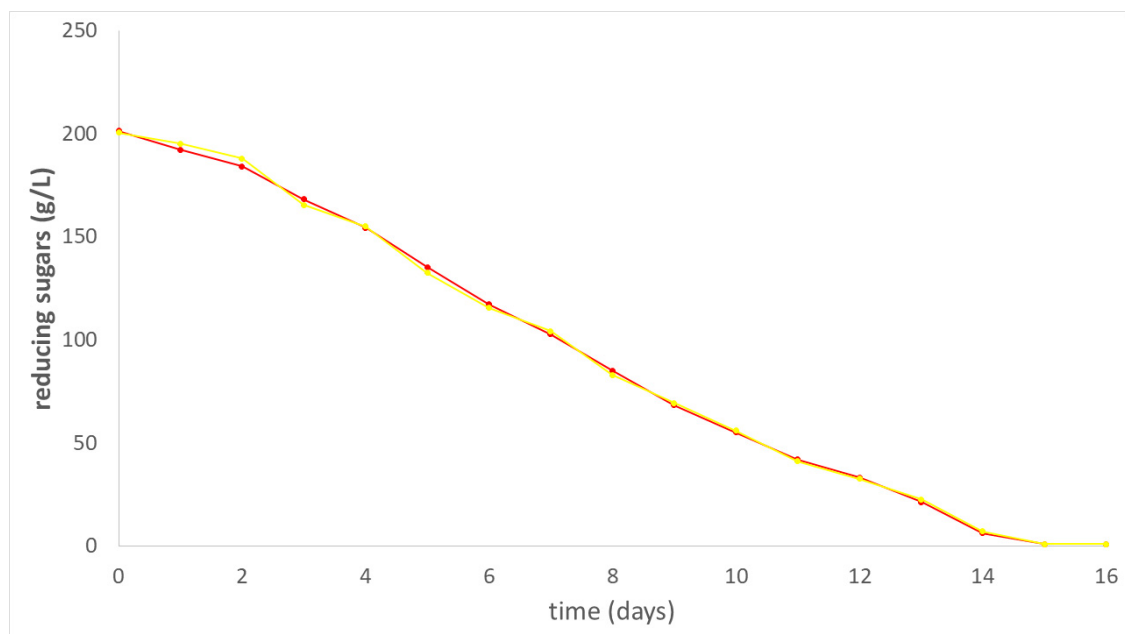

**Figure S3.** Reducing sugars consumption during alcoholic fermentation of Moschofilero must for white (yellow) and rosé (red) winemaking by *Saccharomyces cerevisiae* strain UCLM S325
